# Supplementary material for: Effects of Soil Arthropods on Non-Leaf Litter Decomposition: A Meta-Analysis
Source: MDPI journal article supplement (doi:10.3390/f14081557), 2023-07-30
Supplement: s1 [file s1]

## 5Supplementary Materials

**Table S1.** Information list of the literatures selected in our database

| Number | Author            | Year | Title                                                                                                                                          | Journal                       | Pages      |
|--------|-------------------|------|------------------------------------------------------------------------------------------------------------------------------------------------|-------------------------------|------------|
| 1      | Santos PF, et al. | 1981 | The role of mites and nematodes in early stages of buried litter decomposition in a desert.                                                    | Ecology                       | 664-669.   |
| 2      | Tian G, et al.    | 1992 | Biological effects of plant residues with contrasting chemical compositions under humid tropical conditions-decomposition and nutrient release | Soil Biology & Biochemistry   | 1051-1060. |
| 3      | Curry JP, et al.  | 1997 | Role of earthworms in straw decomposition in a winter cereal field.                                                                            | Soil Biology & Biochemistry   | 555-558.   |
| 4      | Liu ZG, et al.    | 2002 | Exotic earthworms accelerate plant litter decomposition in a Puerto Rican pasture and a wet forest.                                            | Ecological Applications       | 1406-1417. |
| 5      | Joo SJ, et al.    | 2006 | Contribution of microarthropods to the decomposition of needle litter in a Japanese cedar ( <i>Cryptomeria japonica</i> D. Don) plantation.    | Forest Ecology and Management | 192-198.   |
| 6      | Bastow JL, et al. | 2008 | Wood decomposition following a perennial lupine die-off: A 3-year litterbag study.                                                             | Ecosystems                    | 442-453.   |
| 7      | Milcu A, et al.   | 2011 | All size classes of soil fauna and litter quality control the acceleration of litter decay in its home environment.                            | Oikos                         | 1366-1370. |
| 8      | Huan Fan          | 2014 | Effects of soil fauna on litter decomposition and N mineralization under different land management patterns in northern Jiangsu province       | Nanjing Forestry University   |            |
| 9      | Zhan peng,Liu     | 2014 | Decomposition of picea jezoensis twig and the function of soil fauna in Changbai Mo                                                            | Northeast Normal University   |            |
| 10     | Schmidt A, et al. | 2015 | Effects of residue management on decomposition in irrigated rice fields are not related to Changes in the decomposer community.                | Plos One                      | 19         |
| 11     | Fujii S, et al.   | 2016 | Plant species control and soil faunal involvement in the processes of above- and                                                               | Oikos                         | 883-892.   |

|    |                    |      |                                                                                                                    |                                  |            |
|----|--------------------|------|--------------------------------------------------------------------------------------------------------------------|----------------------------------|------------|
|    |                    |      | below-ground litter decomposition.                                                                                 |                                  |            |
| 12 | Fujii S, et al.    | 2018 | Tree leaf and root traits mediate soil faunal contribution to litter decomposition across an elevational gradient. | Functional Ecology               | 840-852.   |
| 13 | Tresch S, et al.   | 2019 | Litter decomposition driven by soil fauna, plant diversity and soil management in urban gardens.                   | Science of the Total Environment | 1614-1629. |
| 14 | Song XX, et al.    | 2020 | The contributions of soil mesofauna to leaf and root litter decomposition of dominant plant species in grassland.  | Applied Soil Ecology             | 8          |
| 15 | Cassani MT, et al. | 2021 | Litter decomposition by soil fauna: effect of land use in agroecosystems                                           | Heliyon                          | 8          |

**Table S2.** The 95% confidence interval (CI), d.f., and Q-value based on subcomponent grouping and test for heterogeneity.

| Comparison                    | Group       | 95% CI |       | d.f. | Q-value |
|-------------------------------|-------------|--------|-------|------|---------|
| Total                         |             | 25.3   | 39.5  | 267  | 4311.3  |
| Climate zone                  | Temperate   | 7.75   | 30.8  | 110  | 1651.9  |
|                               | Subtropical | 42.0   | 65.4  | 109  | 1557.1  |
|                               | Tropical    | 11.3   | 18.3  | 46   | 112.2   |
| Ecosystem type                | Farmland    | -2.11  | 15.2  | 103  | 286.7   |
|                               | Forest      | -6.28  | 7.9   | 61   | 1082.7  |
|                               | Grassland   | 25.9   | 43.2  | 90   | 1228.6  |
| Decomposition time<br>(month) | 12-24       | 4.40   | 17.9  | 6    | 3.78    |
|                               | 6-12        | 12.8   | 25.0  | 81   | 1224.2  |
|                               | 0-6         | 30.9   | 53.2  | 178  | 3040.6  |
| Mesh size<br>(mm)             | >2          | 38.7   | 61.7  | 105  | 1140.5  |
|                               | 1-2         | 33.2   | 105.3 | 38   | 1194.2  |
|                               | 0.5-1       | 7.43   | 20.0  | 121  | 1692.5  |

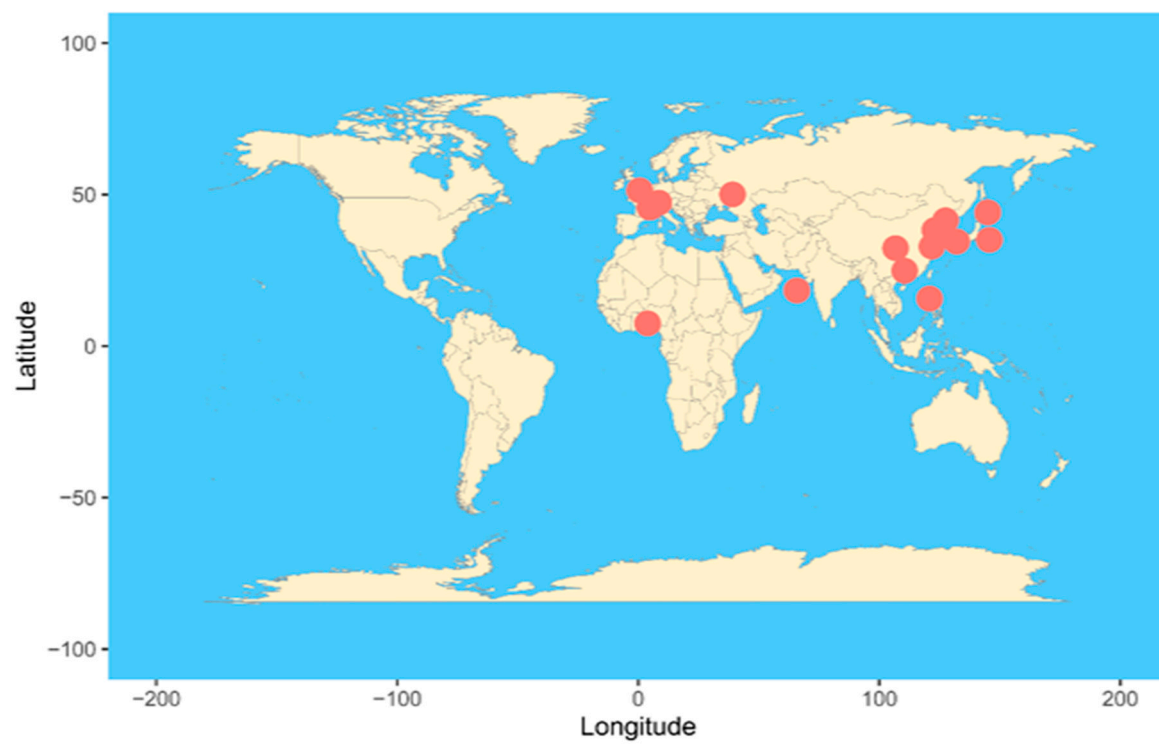

**Figure S1.** Geographical distribution of the experimental sites in this study
